# Supplementary material for: Covalent Organic Frameworks-TpPa-1 as an Emerging Platform for Electrochemical Sensing
Source: MDPI journal article supplement (doi:10.3390/nano12172953), 2022-08-26
Supplement: s1 [file s1]

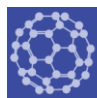

## Supplementary Materials

# Covalent Organic Frameworks-TpPa-1 as an Emerging Platform for Electrochemical Sensing

Gang Li, Baiqing Yuan \*, Sidi Chen, Liju Gan and Chunying Xu

School of Chemistry and Materials Science, Ludong University, Yantai 264025, China

\* Correspondence: baiqingyuan1981@126.com or bqyuan@ldu.edu.cn

The electroactive surface areas of these electrodes could be calculated by the Randles–Sevcik equation using the CV responses of the corresponding electrodes in 0.1 M KCl solution in the presence of 5 mM  $\text{K}_3\text{Fe}(\text{CN})_6$  at different scan rates at 298 K (Hosseini, H., Ahmar, H., Dehghani, A., Bagheri, A., Tadjarodi, A., Fakhari, A.R., 2013. Bio-sens. Bioelectron. 42, 426–429.):

$$I_p = 2.69 \times 10^5 \times A \times n^{3/2} \times D^{1/2} \times C \times v^{1/2}$$

where,  $I_p$  (A) is the peak current,  $A$  ( $\text{cm}^2$ ) is the electroactive surface area,  $n$  is the number of electron transfer which equals 1,  $D = 7.6 \times 10^{-6}$  ( $\text{cm}^2/\text{s}$ ),  $v$  is the scan rate ( $\text{V/s}$ ),  $C$  is the concentration of  $\text{K}_3\text{Fe}(\text{CN})_6$  (mol/mL).

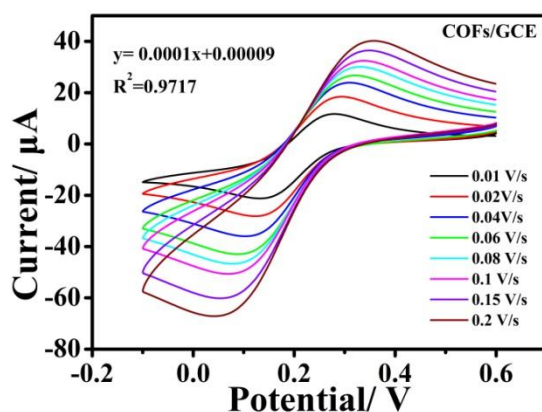

**Figure S1.** The CVs of COFs/GCE in 0.1 M KCl solution in the presence of 5 mM  $\text{K}_3\text{Fe}(\text{CN})_6$  at different scan rates.

COF/ GCE:  $A = 0.027 \text{ cm}^2$ 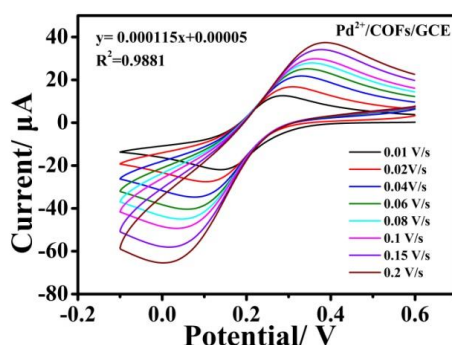

**Figure S2.** The CVs of  $\text{Pd}^{2+}$ /COFs/GCE in 0.1 M KCl solution in the presence of 5 mM  $\text{K}_3\text{Fe}(\text{CN})_6$  at different scan rates.

Pd/ COF/ GCE:  $A=0.041 \text{ cm}^2$

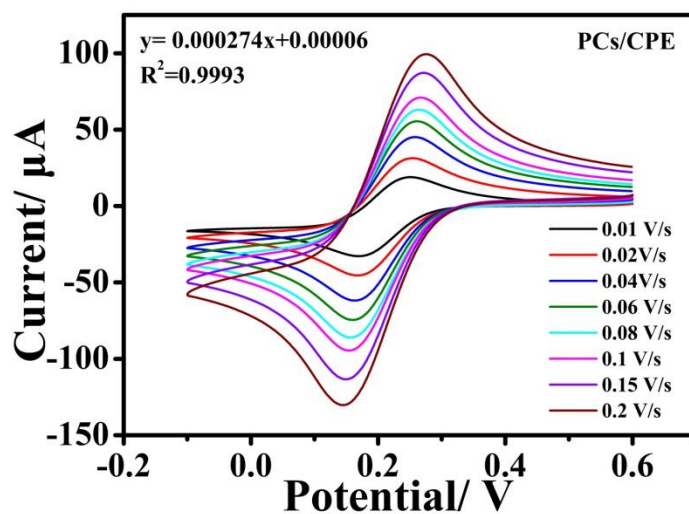

**Figure S3.** The CVs of PCs/GCE in 0.1 M KCl solution in the presence of 5 mM  $\text{K}_3\text{Fe}(\text{CN})_6$  at different scan rates.

PCs:  $A=0.074 \text{ cm}^2$

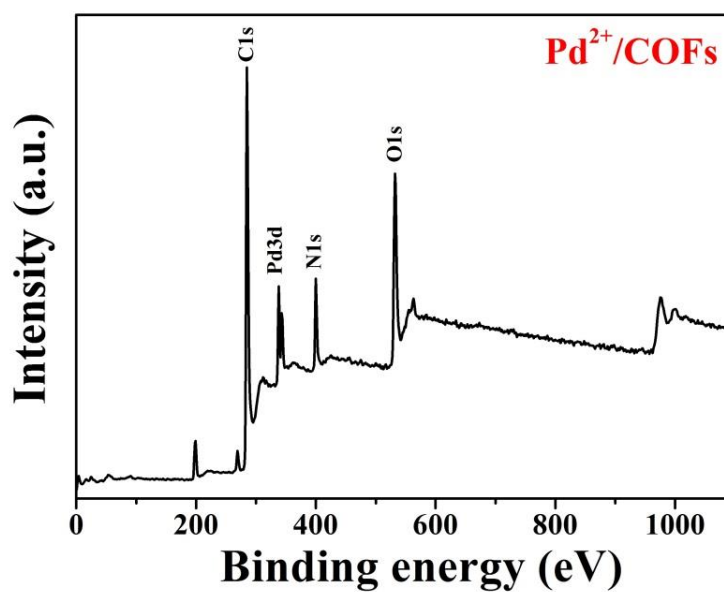

**Figure S4.** XPS spectra of  $\text{Pd}^{2+}/\text{COFs}$ .

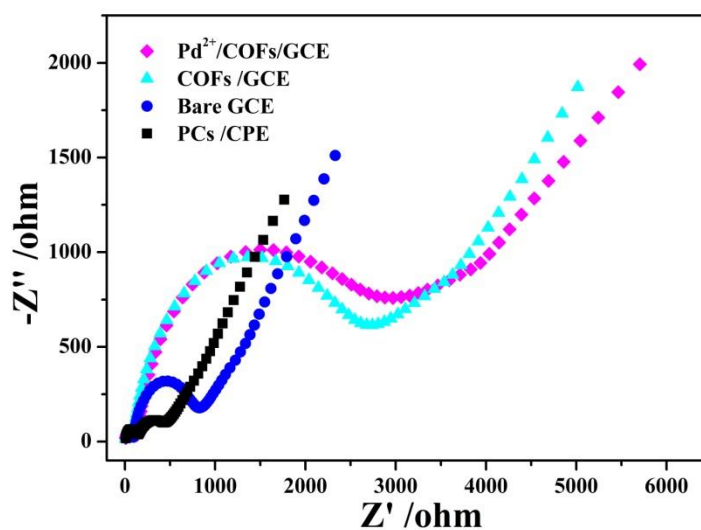

**Figure S5.** EIS of PCs /GCE, Bare GCE ,COFs/GCE, and Pd<sup>2+</sup>/COFs/GCE in 0.1 M KCl solution in the presence of 5 mM K<sub>3</sub>Fe(CN)<sub>6</sub>.

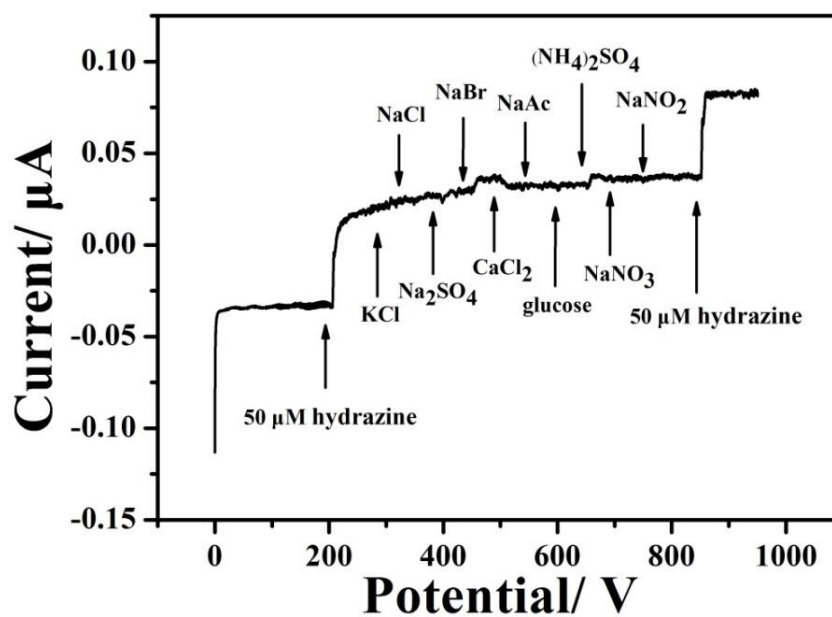

**Figure S6.** Amperometric curve of Pd<sup>2+</sup>/COFs/GCE with 50  $\mu$ M hydrazine and 500  $\mu$ M of interferences such as KCl, NaCl, Na<sub>2</sub>SO<sub>4</sub>, NaBr, CaCl<sub>2</sub>, NaAc, glucose, (NH<sub>4</sub>)<sub>2</sub>SO<sub>4</sub>, NaNO<sub>3</sub>, and NaNO<sub>2</sub>. (Electrolyte: 0.1 M NaOH).

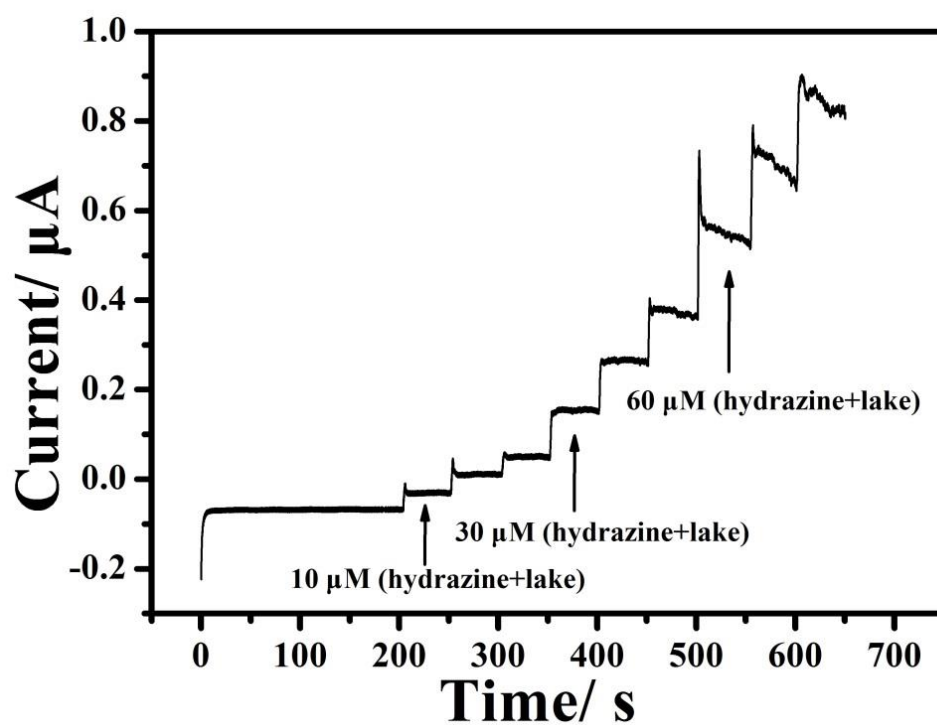

**Figure S7.** Amperometric curve of  $\text{Pd}^{2+}/\text{COFs}/\text{GCE}$  for the detection of hydrazine spiked in water samples at  $-0.1$  V. (Electrolyte: 0.1 M NaOH).

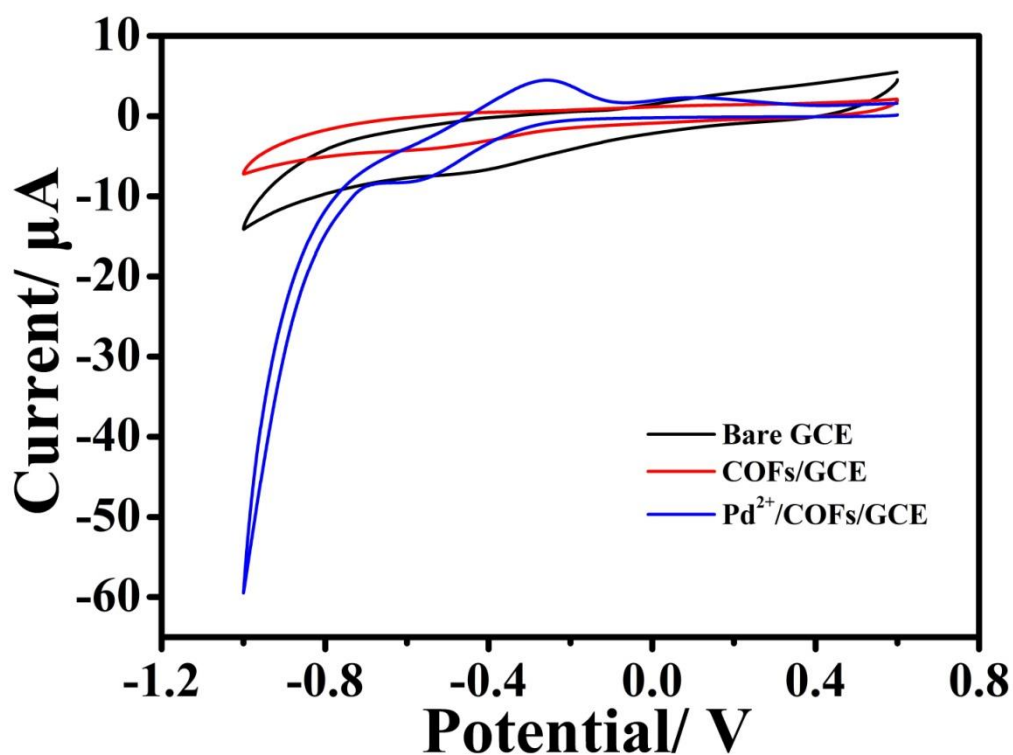

**Figure S8.** CVs of Bare GCE, COFs/GCE, and  $\text{Pd}^{2+}/\text{COFs}/\text{GCE}$  in 0.1 M PBS at a scan rate of  $50 \text{ mV s}^{-1}$  (pH=7.0).

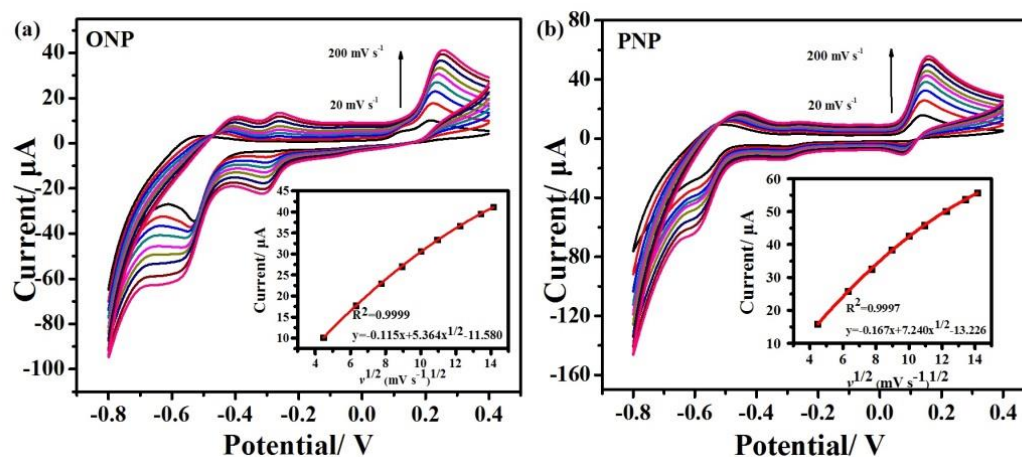

Figure S9. CVs of 500  $\mu\text{M}$  of (a) ONP and (b) PNP on  $\text{Pd}^{2+}/\text{COFs}/\text{GCE}$  with different scan rates (20–200  $\text{mV s}^{-1}$ ) in 0.1 M PBS (pH=7.0). (Inset: the corresponding calibration plot.).

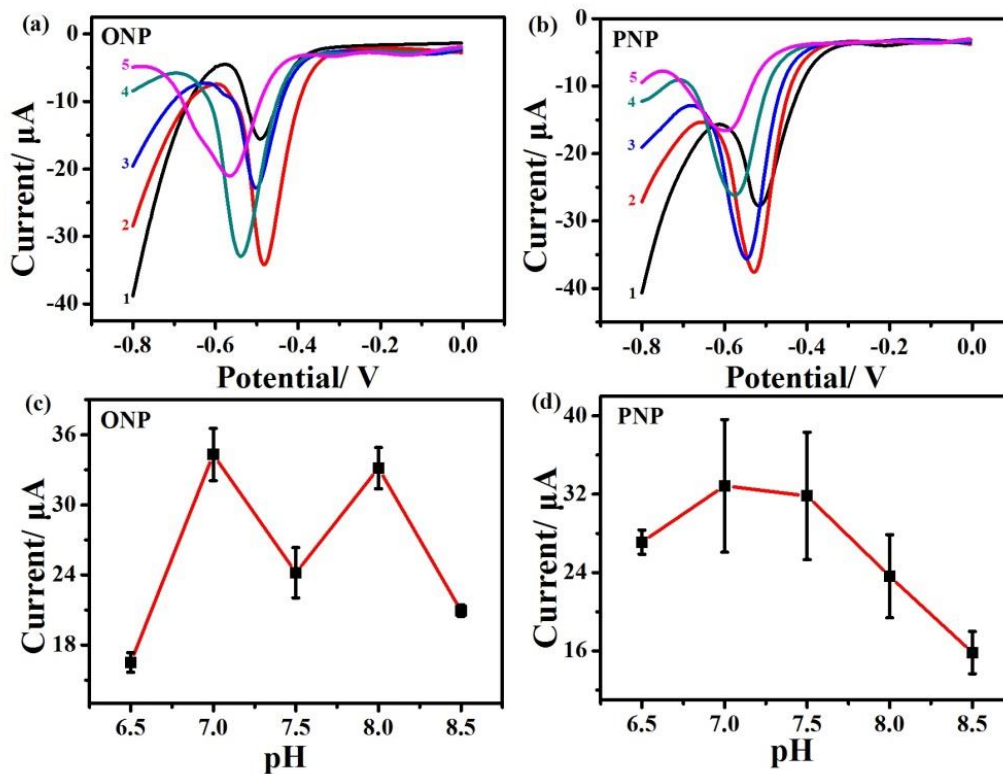

Figure S10. DPV curves of 500  $\mu\text{M}$  of (a) ONP and (b) PNP on  $\text{Pd}^{2+}/\text{COFs}/\text{GCE}$  in 0.1 M PBS (pH=7.0) with different pH values (1–5: 6.5, 7.0, 7.5, 8.0, and 8.5). Plots of  $I_{\text{pc}}$  vs. pH for (c) ONP and (d) PNP.

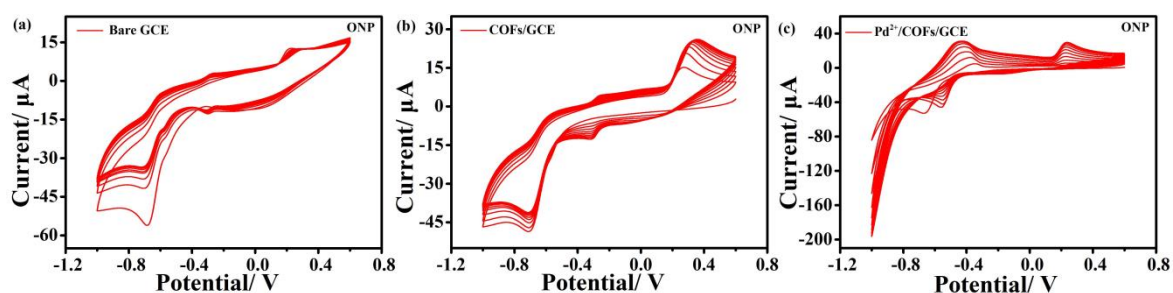

**Figure S11.** Successive CVs of Bare GCE (a), COFs/GCE (b), and Pd<sup>2+</sup>/COFs/GCE (c) in the presence of 500 µM nitrophenol ONP at a scan rate of 50 mV s<sup>-1</sup> in 0.1 M PBS (pH=7).

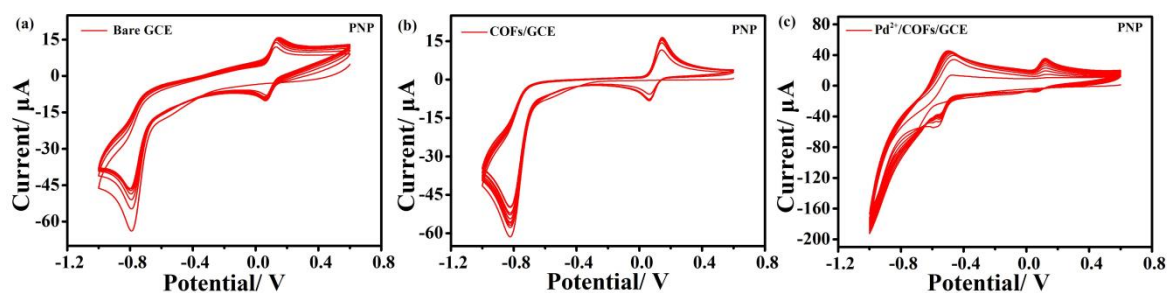

**Figure S12.** Successive CVs of Bare GCE (a), COFs/GCE (b), and Pd<sup>2+</sup>/COFs/GCE (c) in the presence of 500 µM nitrophenol PNP at a scan rate of 50 mV s<sup>-1</sup> in 0.1 M PBS (pH=7.0).

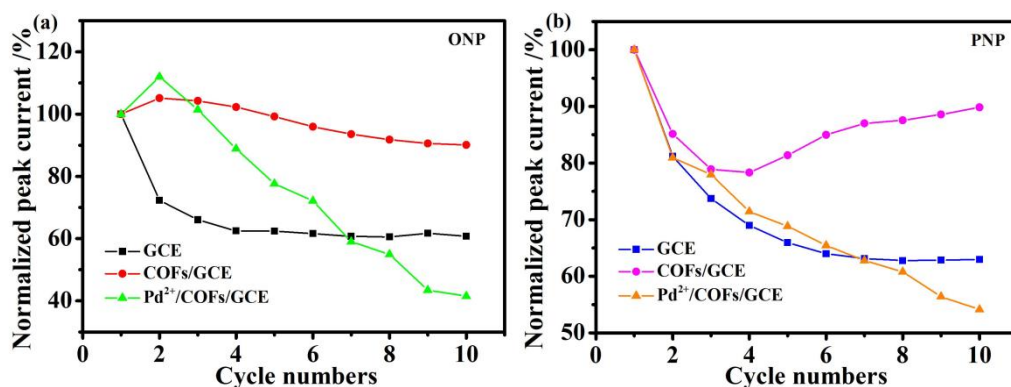

**Figure S13.** Normalized peak current of bare GCE, COFs/GCE, and Pd<sup>2+</sup>/COFs/GCE in the presence of 500 µM nitrophenol ((a): ONP, (b): PNP) at a scan rate of 50 mV s<sup>-1</sup> in 0.1 M PBS (pH=7.0) for ten cycles.

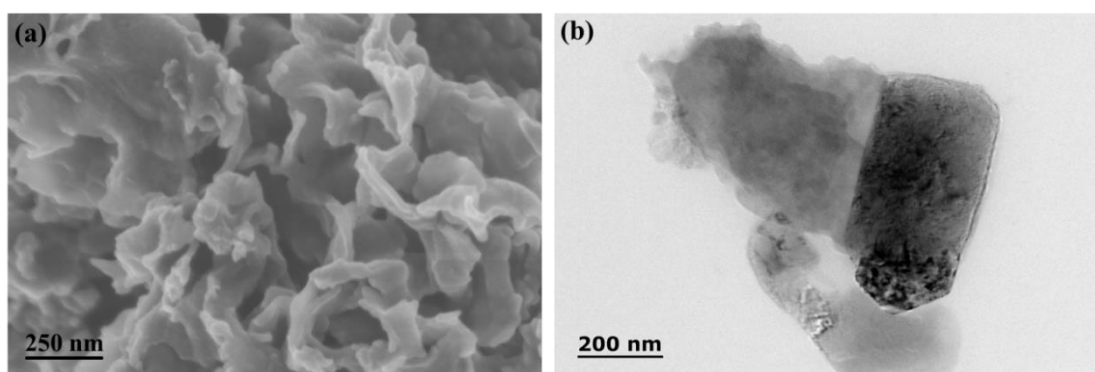

**Figure S14.** SEM (a) and TEM (b) images of PCs.

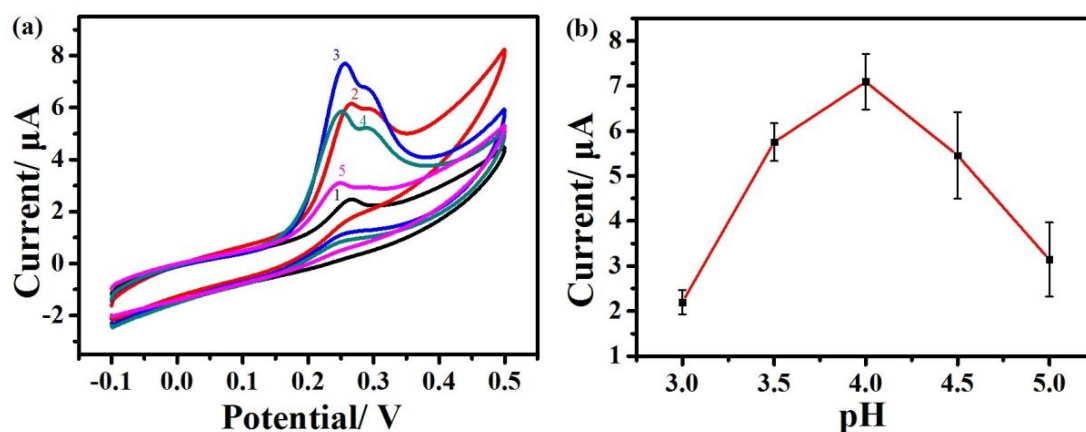

**Figure S15.** CVs of 5 mM of GSH on (a) PCs/CPE in 0.1 M PBS with different pH values (1-5: 3.0, 3.5, 4.0, 4.5 and 5.0). Plots of  $I_{pc}$  vs. pH for (b) GSH.

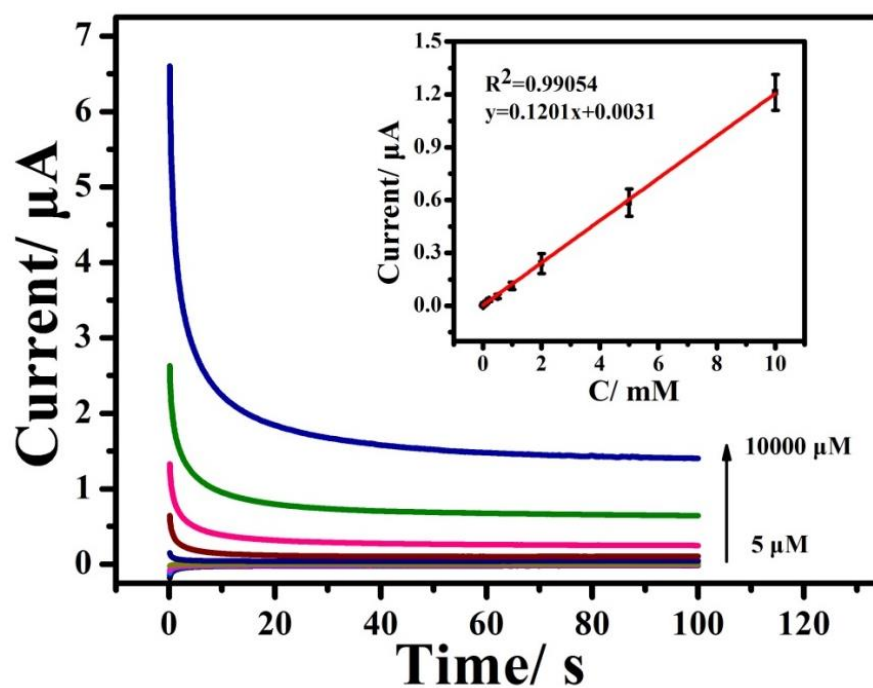

**Figure S16.** Amperometric responses of PCs/CPE to additions of various concentrations of GSH in 0.1 M PBS (pH=4.0) at 0.25 V. (Inset: the corresponding calibration plot.).

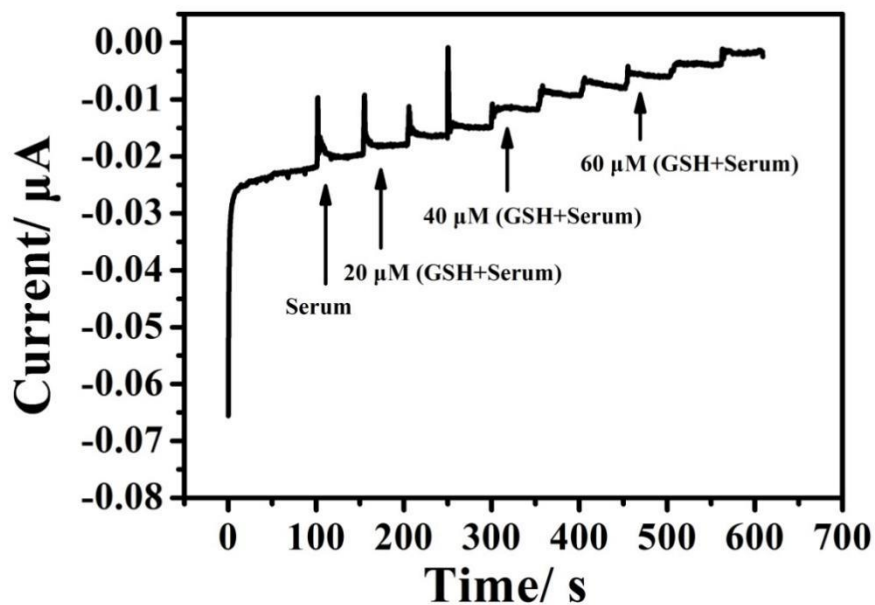

**Figure S17.** Amperometric responses of PCs/CPE to successive additions of various concentrations of GSH spiked in serum in 0.1 M PBS (pH=4.0) at 0.25 V.

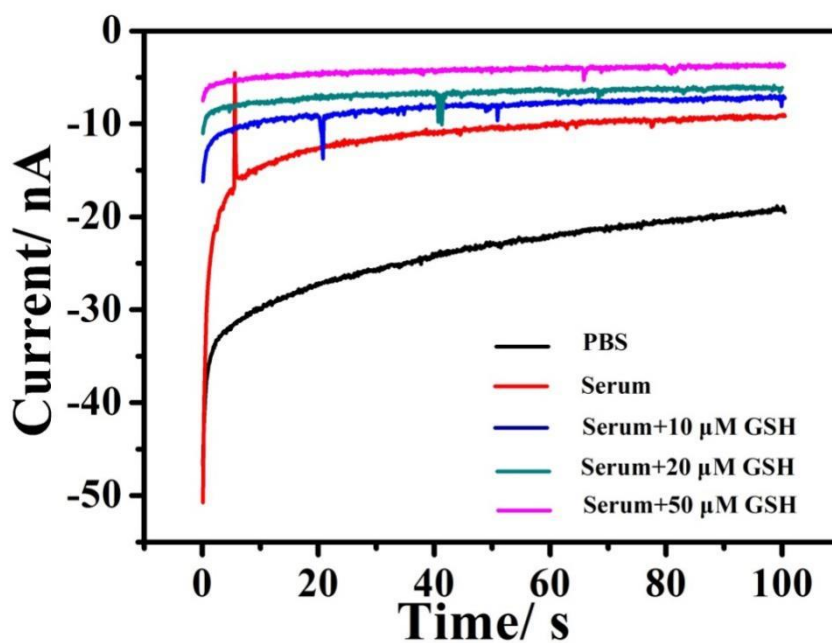

**Figure S18.** Amperometric responses of PCs/CPE for the detection of GSH spiked in human serum in 0.1 M PBS (pH=4.0) at 0.25 V.

**Table S1.** Comparison of the Pd<sup>2+</sup>/COFs/GCE for different parameters with previously reported hydrazine electrodes.

| Electrode Material                         | Electrochemical Method | Potential (V) | Linear Range(μM)    | Detection Range (μM) | Ref.             |
|--------------------------------------------|------------------------|---------------|---------------------|----------------------|------------------|
| Cu-MOFs/OMC/GCE                            | Amperometry            | 0.4           | 0.5-771             | 0.35                 | [1]              |
| CuO/OMC/GCE                                | Amperometry            | 0.31          | 1-2110              | 0.887                | [2]              |
| MSRG/Au/GCE                                | Amperometry            | 0.29          | 2-30                | 0.5                  | [3]              |
| MXene/ZIF-8/GCE                            | Amperometry            | 0.35          | 10-7700             | 5.1                  | [4]              |
| Au@porous<br>P-MWCNT/rGO/GCE               | Amperometry            | 0.4           | 3000-55000          | 0.31                 | [5]              |
| CNT/NiHCF/GCE                              | Amperometry            | 0.36          | 20-200              | 0.8                  | [6]              |
| Cu NP/C                                    | Amperometry            | 0.45          | 100-2400            | 1.4                  | [7]              |
| Ag/ZIF-67/CPE                              | Amperometry            | -0.05         | 4-326<br>326-4700   | 1.45                 | [8]              |
| NPs/CPE                                    | Amperometry            | 0.5           | 1-1300              | 0.28                 | [9]              |
| NiCo <sub>2</sub> S <sub>4</sub> /GCE      | Amperometry            | 0.3           | 1.7-7800            | 0.6                  | [10]             |
| Pt-Pd/ERGO/GCE                             | Amperometry            | -0.71         | 7-5500              | 1.7                  | [11]             |
| PAYR/Ag@C/GCE                              | Amperometry            | 0.4           | 1-1320              | 0.25                 | [12]             |
| rGO-Co <sub>3</sub> O <sub>4</sub> @Au/GCE | Amperometry            | 0.079         | 10-620              | 0.443                | [13]             |
| ZnO/Co <sub>3</sub> O <sub>4</sub> /GCE    | Amperometry            | -0.2          | 2-1500<br>1500-5500 | 0.52                 | [14]             |
| <b>Pd<sup>2+</sup>/COFs/GCE</b>            | <b>Amperometry</b>     | <b>-0.1</b>   | <b>0.5-1588.5</b>   | <b>0.2</b>           | <b>This work</b> |

**Table S2.** Determination of hydrazine spiked in water samples.

| Added (μM) | Found (μM) | Recovery (%) | RSD (%) |
|------------|------------|--------------|---------|
| 10         | 9.5        | 95           | 7.3     |
| 30         | 26.7       | 89           | 3.9     |
| 60         | 51.3       | 85.3         | 1.4     |

**Table S3.** Comparison of different modified GCE for detection of ONP and PNP.

| Electrode Material                                | Electrochemical Method | Linear Range (μM) |                  | Detection Limit (μM) |             | References       |
|---------------------------------------------------|------------------------|-------------------|------------------|----------------------|-------------|------------------|
|                                                   |                        | ONP               | PNP              | ONP                  | PNP         |                  |
| BSO-gCN/GCE                                       | LSV                    | /                 | 1.6-50           | /                    | 1           | [15]             |
| AcSCD-AuNPs-MC/GCE                                | DPV                    | /                 | 0.1-10<br>10-350 | /                    | 3.63        | [16]             |
| CeO <sub>2</sub> :Ag/GCE                          | CV                     | /                 | 7.81-1000        | /                    | 1.2         | [17]             |
| 5-sulfosalicylic acid<br>doped<br>polyaniline/GCE | DPV                    | /                 | 6.7-112.1        | /                    | 3.2         | [18]             |
| BaO NRs/GCE                                       | DPV                    | 5-640             | /                | 0.5                  | /           | [19]             |
| Mg/Fe-LDH /GCE                                    | Amperometry            | 1-700             | /                | 4                    | /           | [20]             |
| SDS-HTLC/GCE                                      | DPV                    | 1-600             | /                | 0.5                  | /           | [21]             |
| MnFe-PBA/GCE                                      | DPV                    | 1-700             | /                | 0.59                 | /           | [22]             |
| nano-Au/GCE                                       | CV                     | 10-1000           | 10-1000          | 8                    | 8           | [23]             |
| meso-ZnCo <sub>2</sub> O <sub>4</sub> /GCE        | DPV                    | 1-4000            | 1-4000           | 0.3                  | 0.3         | [24]             |
| PEDOT:PSS/GCE                                     | LSV                    | 10-3000           | 10-3000          | 4.55                 | 4.51        | [25]             |
| <b>Pd<sup>2+</sup>/COFs/GCE</b>                   | <b>DPV</b>             | <b>5-2000</b>     | <b>5-2000</b>    | <b>1.75</b>          | <b>0.91</b> | <b>This work</b> |

**Table S4.** Comparison of different modified electrodes for electrochemical sensing of GSH.

| Electrode Material                            | Electrochemical Method | pH         | Linear Range ( $\mu\text{M}$ ) | Detection Limit ( $\mu\text{M}$ ) | Ref.      |
|-----------------------------------------------|------------------------|------------|--------------------------------|-----------------------------------|-----------|
| GO/GCE                                        | Amperometry            | 5          | 5-875<br>875-4080              | 5                                 | [26]      |
| CoPcS-NWE                                     | Amperometry            | 4          | 10-20000                       | 8.3                               | [27]      |
| N-doped ZnO/C hollow rhombic dodecahedral/GCE | CV                     | 7.4        | 1-500                          | 8                                 | [28]      |
| MWCNTs/SPE                                    | CV                     | 7.3        | 5-20                           | 2                                 | [29]      |
| CNTs/SPE                                      | CV                     | 7          | 10-60                          | 3                                 | [30]      |
| Co-MOCP/CPE                                   | Amperometry            | 5.5        | 2.5-950                        | 2.5                               | [31]      |
| Pt/rGMnO                                      | Amperometry            | 6.5        | 1-10<br>10-100                 | 0.9                               | [32]      |
| Co(II)TAPc-TA/Au                              | DPV                    | 7.4        | 10-100                         | 0.28                              | [33]      |
| N-G/CoPc/GCE                                  | Amperometry            | 0.1 M NaOH | 1-8000                         | 0.6                               | [34]      |
| RuHCF/rGO/PIGE                                | SWV                    | 5          | 5.12-25.58                     | 1.7                               | [35]      |
| PCs/CPE                                       | Amperometry            | 4          | 5-10000                        | 1                                 | This work |

**Table S5.** Determination of GSH spiked in human serum by successive additions.

| Added ( $\mu\text{M}$ ) | Expected ( $\mu\text{M}$ ) | Recovery (%) | RSD (%) |
|-------------------------|----------------------------|--------------|---------|
| 20                      | 19.2                       | 96           | 4.2     |
| 40                      | 39.6                       | 99           | 2.5     |
| 60                      | 54.9                       | 91.5         | 1.7     |

**Table S6.** Determination of GSH spiked in human serum by a non-successive addition method.

| Added ( $\mu\text{M}$ ) | Detected ( $\mu\text{M}$ ) | Recovery (%) | RSD (%) |
|-------------------------|----------------------------|--------------|---------|
| 10                      | 10.7                       | 107          | 3.0     |
| 20                      | 18.9                       | 94.5         | 2.4     |
| 50                      | 46                         | 92           | 1.1     |

## References

1. L. Wang, Q.Q. Teng, X.T. Sun, Y.T. Chen, Y.M. Wang, H. Wang, Y.F. Zhang, Facile synthesis of metal-organic frameworks/ordered mesoporous carbon composites with enhanced electrocatalytic ability for hydrazine, *J. Colloid. Interf. Sci.* 512(2018) 127-133.
2. L. Wang, T.J. Meng, H.X. Jia, Y. Feng, T. Gong, H. Wang, Y.F. Zhang, Electrochemical study of hydrazine oxidation by leaf-shaped copper oxide loaded on highly ordered mesoporous carbon composite, *J. Colloid Interface Sci.* 549(2019) 98-104.
3. M. Gharani, A. Bahari, S. Ghasemi, Preparation of MoS<sub>2</sub>-reduced graphene oxide/Au nanohybrid for electrochemical sensing of hydrazine, *J. Mater. Sci. Mater. Electron.* 32(2021) 7765-7777.
4. Y.Q. Yao, X.H. Han, X.H. Yang, J. Zhao, C.P. Chai, Detection of Hydrazine at MXene/ZIF-8 Nanocomposite Modified Electrode, *Chin. J. Chem.* 39(2021) 330-336.
5. X.J. Zhang, J.B. Zheng, Amperometric hydrazine sensor based on the use of a gold nanoparticle-modified nanocomposite consisting of porous polydopamine, multiwalled carbon nanotubes and reduced graphene oxide, *Mikrochim. Acta.* 187(2020) 89.
6. N. Vishnu, A.S. Kumar, S. Badhulika, Selective in-situ derivatization of intrinsic nickel to nickel hexacyanoferrate on carbon nanotube and its application for electrochemical sensing of hydrazine, *J. Electroanal. Chem.* 837(2019) 60-66.
7. S. Li, W.S. Feng, X.H. Gao, A.M. Guo, H.J. Li, Copper-based materials derived from metal-organic frameworks for electrochemical sensing of hydrazine, *Micro Nano Lett.* 16(2021) 478-483.
8. F. Asadi, S.N. Azizi, S. Ghasemi, Preparation of Ag nanoparticles on nano cobalt-based metal organic framework (ZIF-67) as catalyst support for electrochemical determination of hydrazine, *J. Mater. Sci. Mater. Electron.* 30(2019) 5410-5420.
9. A. Avanes, M. Hasanazadeh-Karamjavan, G. Shokri-Jarcheloo, Electrocatalytic oxidation and amperometric determination of hydrazine using a carbon paste electrode modified with beta-nickel hydroxide nanoplatelets, *Mikrochim. Acta.* 186(2019) 441.

10. C.Q. Duan, Y.H. Dong, Q.L. Sheng, J.B. Zheng, A high-performance non-enzymatic electrochemical hydrazine sensor based on  $\text{NiCo}_2\text{S}_4$  porous sphere, *Talanta*. 198(2019) 23-29.
11. S. Ghasemi, S.R. Hosseini, F. Hasanpoor, S. Nabipour, Amperometric hydrazine sensor based on the use of Pt-Pd nanoparticles placed on reduced graphene oxide nanosheets, *Mikrochim. Acta*. 186(2019) 601.
12. A. Maleki, R. Rezaee, H. Daraei, B. Shahmoradi, N. Amini, Fabrication of a sensitive electrochemical sensor to environmental pollutant of hydrazine in real water samples based on synergistic catalysis of Ag@C core-shell and polyalizarin yellow R, *J. Alloys Compd.* 763(2018) 997-1004.
13. M.M. Shahid, P. Rameshkumar, W.J. Basirunc, U. Wijayantha, W.S. Chiu, P.S. Khiew, N.M. Huang, An electrochemical sensing platform of cobalt oxide@gold nanocubes interleaved reduced graphene oxide for the selective determination of hydrazine, *Electrochim. Acta*. 259(2018) 606-616.
14. A. Mousavi-Majd, S. Ghasemi, S.R. Hosseini, Zeolitic imidazolate framework derived porous  $\text{ZnO}/\text{Co}_3\text{O}_4$  incorporated with gold nanoparticles as ternary nanohybrid for determination of hydrazine, *J. Alloys Compd.* 896(2022).
15. S. Vinoth, P. Sampathkumar, K. Giribabu, A. Pandikumar, Ultrasonically assisted synthesis of barium stannate incorporated graphitic carbon nitride nanocomposite and its analytical performance in electrochemical sensing of 4-nitrophenol, *Ultrasonics Sonochemistry*, *Ultrason. Sonochem.* 62(2020) 104855.
16. Y.Y. Zhou, J. Zhao, S.H. Li, M.J. Guo, Z. Fan, An electrochemical sensor for the detection of p-nitrophenol based on a cyclodextrin-decorated gold nanoparticle-mesoporous carbon hybrid, *Analyst*. 144(2019) 4400-4406.
17. A.A. Ansari, M. Alam, M.A. Ali, Nanostructured  $\text{CeO}_2$ : Ag platform for electrochemically sensitive detection of nitrophenol, *Colloids Surf. A*. 613(2021) 126116.
18. R. Suresh, K. Giribabu, R. Manigandan, S. Praveen Kumar, S. Munusamy, S. Muthamizh, V. Narayanan, Polyaniline Nanorods: Synthesis, Characterization, and Application for the Determination of para-Nitrophenol, *Anal. Lett.* 49(2015) 269-281.
19. M.M. Alam, A.M. Asiri, M.M. Rahman, Electrochemical detection of 2-Nitrophenol using a glassy carbon electrode modified with BaO Nanorods, *Chem. Asian. J.* 16(2021) 1475-1485.
20. K. Nejati, K. Asadpour-Zeynali, Z. Rezvani, R. Peyghami, Determination of 2-nitrophenol by electrochemical synthesized Mg/Fe layered double hydroxide sensor, *Int. J. Electrochem. Sci.* 9(2014) 5222-5234.
21. H.S. Yin, Y.L. Zhou, S.Y. Ai, L. Cui, L.S. Zhu, Electrochemical determination of 2-Nitrophenol in Water Samples using Mg-Al-SDS Hydrotalcite-Like Clay modified glassy carbon electrode, *Electroanalysis*. 22(2010) 1136-1142.
22. J.H. Li, L.Z. He, J.B. Jiang, Z.F. Xu, M.Q. Liu, X. Liu, H.X. Tong, Z. Liu, D. Qian, Facile syntheses of bimetallic Prussian blue analogues ( $\text{K}_x\text{M}[\text{Fe}(\text{CN})_6] \cdot n\text{H}_2\text{O}$ ,  $\text{M}=\text{Ni}$ ,  $\text{Co}$ , and  $\text{Mn}$ ) for electrochemical determination of toxic 2-nitrophenol, *Electrochim. Acta*, 353(2020) 136579.
23. L. Chu, L. Han, X.L. Zhang, Electrochemical simultaneous determination of nitrophenol isomers at nano-gold modified glassy carbon electrode, *J. Appl. Electrochem.* 41(2011) 687-694.
24. J.J. Zhang, S.Q. Cui, Y.P. Ding, X.X. Yang, K. Guo, J.T. Zhao, Bioelectronics, Two-dimensional mesoporous  $\text{ZnCo}_2\text{O}_4$  nanosheets as a novel electrocatalyst for detection of o-nitrophenol and p-nitrophenol, *Biosens. Bioelectron.* 112(2018) 177-185.
25. B.M. Hryniewicz, E.S. Orth, M. Vidotti, Enzymeless PEDOT-based electrochemical sensor for the detection of nitrophenols and organophosphates, *Sens. Actuators B Chem.* 257(2018) 570-578.
26. B.Q. Yuan, X.Y. Zeng, C.Y. Xu, L. Liu, Y.H. Ma, D.J. Zhang, Y. Fan, Electrochemical modification of graphene oxide bearing different types of oxygen functional species for the electro-catalytic oxidation of reduced glutathione, *Sens. Actuators B Chem.* 184(2013) 15-20.
27. W.T. Wu, X. Chen, Y.T. Jiao, W.T. Fan, Y.L. Liu, W.H. Huang, Versatile Construction of Biomimetic Nanosensors for Electrochemical Monitoring of Intracellular Glutathione, *Electroanal. Chem.* 134(2022) e202115820.
28. L.Z. Zhao, L. Zhao, Y. Miao, C.X. Zhang, Selective electrochemical determination of glutathione from the leakage of intracellular GSH contents in HeLa cells following doxorubicin-induced cell apoptosis, *Electrochim. Acta*. 206(2016) 86-98.
29. P. Lee, R.G. Compton, Selective electrochemical detection of thiol biomarkers in saliva using multiwalled carbon nanotube screen-printed electrodes, *Sens. Actuators B Chem.* 209(2015) 983-988.
30. P.T. Lee, L.M. Goncalves, R.G. Compton, Electrochemical determination of free and total glutathione in human saliva samples, *Sens. Actuators B Chem.* 221(2015) 962-968.
31. B.Q. Yuan, R.C. Zhang, X.X. Jiao, J. Li, H.Z. Shi, D.J. Zhang, Amperometric determination of reduced glutathione with a new Co-based metal-organic coordination polymer modified electrode, *Electrochem. Commun.* 40(2014) 92-95.
32. S. Kannappan, L. Ramachandra Bhat, N. Nesakumar, K.J. Babu, A.J. Kulandaisamy, J.B.B. Rayappan, Design and development of a non-enzymatic electrochemical biosensor for the detection of Glutathione, *Electroanalysis*. 34(2022)1-12.
33. M.N. Abbas, A.A. Saeed, M.B. Ali, A. Errachid, N. Zine, A. Baraket, B. Singh, Biosensor for the oxidative stress biomarker glutathione based on SAM of cobalt phthalocyanine on a thioctic acid modified gold electrode, *J. Solid State Electrochem.* 23(2019) 1129-1144.
34. H.Y. Xu, J.J. Xiao, B. Liu, S. Griveau, F. Bedioui, Enhanced electrochemical sensing of thiols based on cobalt phthalocyanine immobilized on nitrogen-doped graphene, *Biosens. Bioelectron.* 66(2015) 438-444.
35. S. Saranya, B. Geetha, P.N. Deepa, Simultaneous detection of glutathione, threonine, and glycine at electrodeposited  $\text{RuHCF}/\text{rGO}$ -modified electrode, *Ionics*. 25(2019) 5537-5550.
